# Supplementary material for: Promoter- and RNA polymerase II–dependent hsp-16 gene association with nuclear pores in Caenorhabditis elegans
Source: PubMed Central journal article supplement — J Cell Biol. 2013 Mar 4;200(5):589–604. doi: 10.1083/jcb.201207024 (PMC3587839; doi:10.1083/jcb.201207024), 2013-03-04
Supplement: supp_jcb.201207024_JCB_201207024_sm.pdf [file supp_jcb.201207024_JCB_201207024_sm.pdf]

Rohner et al., <http://www.jcb.org/cgi/content/full/jcb.201207024/DC1>

**A** *gwls4*[*myo-3::RFP*; *baf-1p::GFP-lacI*, *lacO*]  
 Before HS      0' after HS (10' @ 34°C)

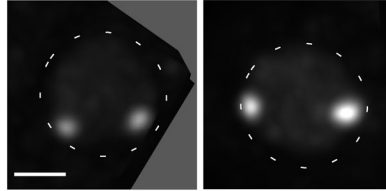

*gpls1* [*hsp::16.2::GFP*, *lacO*] + *gwls39*  
 [*vit-5::GFP*; *baf-1p::GFP-lacI*, no *lacO*]

Before HS      0' after HS (10' @ 34°C)

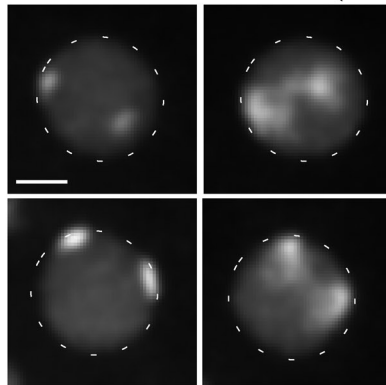

**B** *hsf-1*(*sy441*) *gpls1* *gwls4*

Before HS      0' after HS (10' @ 34°C)

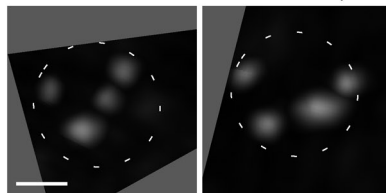

Figure S1. **Controls for the induced integrated array of *hsp-16.2* promoter.** (A) HS does not induce decondensation of a large array bearing *baf-1* promoter-driven GFP-lacI in embryos. Nuclei from an embryo of a strain carrying only the GFP-lacI-expressing array *gwls4* are shown before and after HS. No change in array shape is observed upon HS. (B) *hsf-1*(*sy441*) impairs decondensation of HS-activated arrays. In a strain carrying both a GFP-lacI-expressing array (*gwls4*) and an HS-activated array (*gpls1*), no difference in size can be observed before and after HS. Each nucleus is encircled by a broken line. Bars, 2  $\mu$ m.

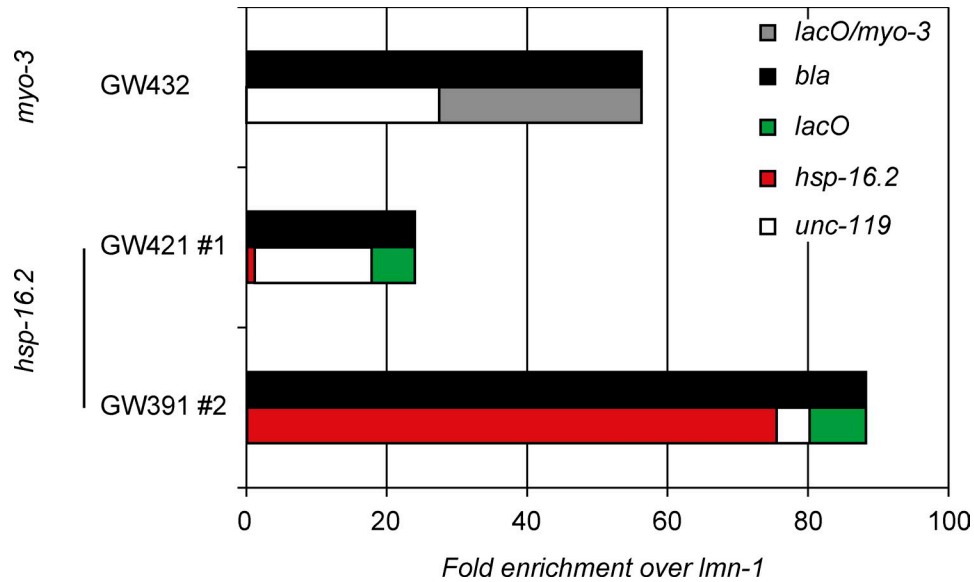

Figure S2. **Quantification by real-time PCR of the number of plasmids present in the small arrays carrying *hsp-16.2::mCherry*.** Copy numbers of plasmids found in integrated transgenes shown in Fig. 2 D were determined for *unc-119*, *hsp-16.2*, and the *bla* sequences (present in all plasmids). Normalization of PCR efficiency for *unc-119* and *hsp-16.2* was achieved using WT worms. The *lacO* copy number was calculated by subtracting the *unc-119* and *hsp-16.2* plasmid number from the total *bla* copy number.

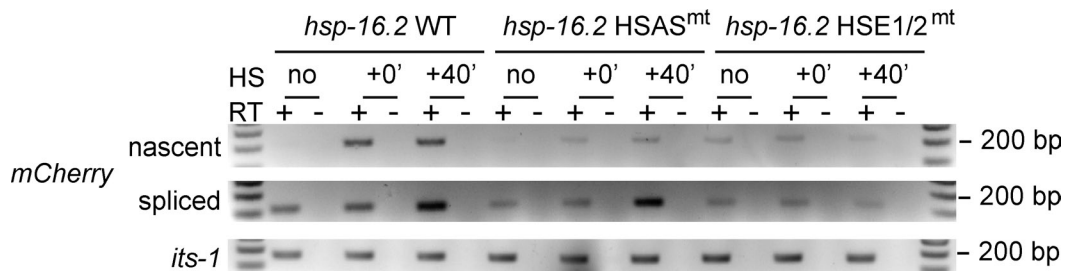

Figure S3. **PCR amplification detects *mCherry* mRNA in a reverse transcription-dependent manner.** Nascent and spliced RNAs were detected by real-time PCR of RNA driven from the indicated mutant *hsp-16.2* promoters in the MosSCI integration. The levels are extremely low when normalized to *its-1* (Fig. 5). Detection of transcripts is nonetheless possible after 30 cycles of normal PCR using primers specific for the nascent (top row) and spliced (middle row) *mCherry* RNA, performed on reverse-transcribed RNA isolated from the indicated MosSCI integration strains. Amplification from a control rDNA spacer transcript, *its-1*, is shown in the bottom row. All amplifications are dependent on reverse transcription (RT) and are therefore not caused by contaminating DNA. Amplicon signals are visible even though the levels for both nascent and spliced *mCherry* are reduced in the mutant constructs.

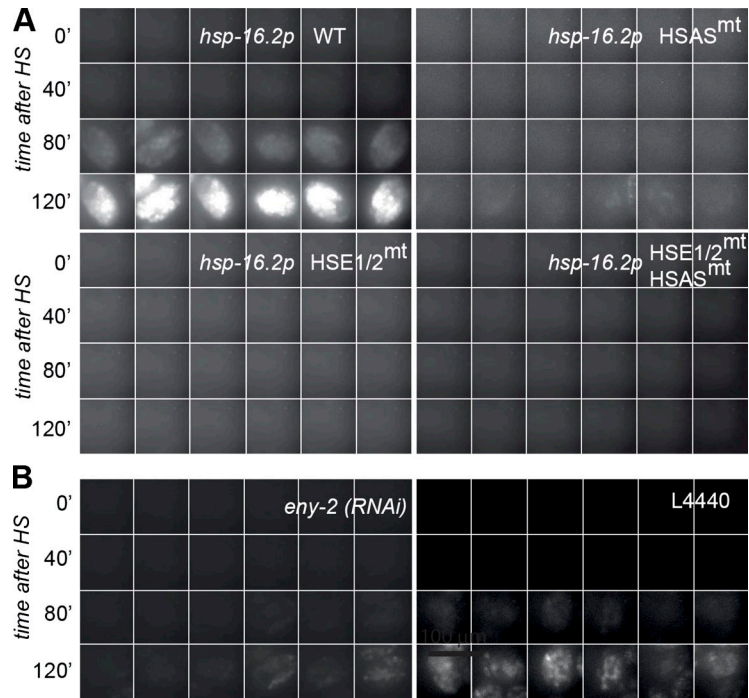

Figure S4. **mCherry protein detection after HS induction.** (A) Red fluorescence signal from mCherry protein in 24 whole embryos from worms carrying the WT or mutated *hsp-16.2* promoter MosSCI insertions driving *mCherry*, as described in Fig. 5 B and scored in Fig. 5 C. The same contrast and brightness was applied to all images. (B) mCherry red fluorescence signal from embryos of the progeny of control RNAi or *eny-2(RNAi)* fed adults as scored in Fig. 7 B. The same contrast and brightness was applied to all images.

Table S1. Overview of *C. elegans* strains used including genetic details

| Strain name | Genotype                                                                                                                                                                | Arrays/transgenes                  |
|-------------|-------------------------------------------------------------------------------------------------------------------------------------------------------------------------|------------------------------------|
| N2          | WT Bristol isolate                                                                                                                                                      |                                    |
| GW76        | <i>gwls4[myo-3::rfp baf-1::gfp-lacI let-858 3' UTR] X</i>                                                                                                               | <b>Large array</b>                 |
| GW102       | <i>gwls4 [myo-3::rfp baf-1::gfp-lacI let-858 3' UTR] X; gpls1[hsp-16.2::gfp]</i>                                                                                        | <b>Large arrays</b>                |
| GW220       | <i>gwls4 [myo-3::rfp baf-1::gfp-lacI let-858 3' UTR] X; gpls1[hsp-16.2::gfp] hsf-1[sy441]</i>                                                                           | <b>Large arrays</b>                |
| GW391       | <i>gwls49[hsp-16.2::mCherry 256xLacO 4xLexA; unc-119(+); unc-119(ed3) III; gwls39[baf-1::GFP-LacI::let-858 3' UTR; vit-5::GFP] III</i>                                  | <b>Small transgene/large array</b> |
| GW421       | <i>gwls58[hsp-16.2::mCherry 256xLacO 4xLexA; unc-119(+); unc-119(ed3) III; gwls39[baf-1::GFP-LacI::let-858 3' UTR; vit-5::GFP] III</i>                                  | <b>Small transgene/large array</b> |
| GW432       | <i>gwls28[myo-3::wmCherry unc-119(+) 256 x LacO 4xLexA; unc-119(+); gwls39[baf-1::GFP-LacI::let-858 3' UTR; vit-5::GFP] III; unc-119(?) III</i>                         | <b>Small transgene/large array</b> |
| GW440       | <i>gwSi0[256x lacO; unc-119(+); gwls39[baf-1::GFP-LacI::let-858 3' UTR; vit-5::GFP] III; unc-119(ed3) III</i>                                                           | <b>MosSCI/large array</b>          |
| GW615       | <i>gwSi3[hsp-16.2::wmCherry; 256x lacO; unc-119(+); gwls39[baf-1::GFP-LacI::let-858 3' UTR; vit-5::GFP] III; unc-119(ed3) III</i>                                       | <b>MosSCI/large array</b>          |
| GW644       | <i>gwSi5[hsp-16.2 HSE1/2<sup>mt</sup>::wmCherry; 256x lacO; unc-119(+); gwls39[baf-1::GFP-LacI::let-858 3' UTR; vit-5::GFP] III; unc-119(ed3) III</i>                   | <b>MosSCI/large array</b>          |
| GW648       | <i>gwSi9[hsp-16.2 HSAS<sup>mt</sup>HSE1/2<sup>mt</sup>::wmCherry; 256x lacO; unc-119(+); gwls39[baf-1::GFP-LacI::let-858 3' UTR; vit-5::GFP] III; unc-119(ed3) III</i>  | <b>MosSCI/large array</b>          |
| GW649       | <i>gwSi10[hsp-16.2 HSAS<sup>mt</sup>::wmCherry; 256x lacO; unc-119(+); gwls39[baf-1::GFP-LacI::let-858 3' UTR; vit-5::GFP] III; unc-119(ed3) III</i>                    | <b>MosSCI/large array</b>          |
| GW597       | <i>gwls58[hsp-16.2::mCherry 256xLacO 4xLexA; unc-119(+); unc-119(ed3) III; gwls39[baf-1::GFP-LacI::let-858 3' UTR; vit-5::GFP] II; dpy-13(e184) ama-1(m118m251) IV</i>  | <b>Small transgene/large array</b> |
| GW691       | <i>gwls58[hsp-16.2::mCherry 256xLacO 4xLexA; unc-119(+); unc-119(ed3) III; gwls39[baf-1::GFP-LacI::let-858 3' UTR; vit-5::GFP] III; dpy-13(e184) ama-1(m118m238) IV</i> | <b>Small transgene/large array</b> |
| GW692       | <i>gwSi13[256x lacO @ tTi9115; unc-119(+)]V; unc-119(ed3)III; gwls39[baf-1::GFP-LacI::let-858 3' UTR; vit-5::GFP] III</i>                                               | <b>MosSCI/large array</b>          |
| GW815       | <i>gwSi16[ hsp-16.2/41::mCherry 2x]; unc-119(ed3)III; gwls39 [baf-1::GFP-LacI::let-858 3' UTR; vit-5::GFP]III</i>                                                       | <b>MosSCI/large array</b>          |
| GW820       | <i>gwSi13[256x lacO @ tTi9115; unc-119(+)]V; unc-119(ed3)III; gwls39[baf-1::GFP-LacI::let-858 3' UTR; vit-5::GFP] III; dpy-13(e184) ama-1(m118m251)IV</i>               | <b>MosSCI/large array</b>          |
| PMW54       | <i>gwls39[baf-1::gfp-lacI let-858 3' UTR; vit-5::gfp] III; gpls1[hsp-16.2::gfp]</i>                                                                                     | <b>Large array/large array</b>     |

Arrays indicated in bold contain *lacO* sites and make a visible spot when combined with GFP-LacI.

Table S2. Overview of primers used

| Amplified Locus                   | Sequence (5'-3')        | Forward/reverse | Locus              | Used for         |
|-----------------------------------|-------------------------|-----------------|--------------------|------------------|
| <i>mCherry; processed</i>         | ATTACGATGCTGAGGTGAAGAC  | Forward         | Transgene          | qPCR on cDNA     |
| <i>mCherry; processed</i>         | CGATAGTGTAAATCCTCGTTGTG | Reverse         | Transgene          | qPCR on cDNA     |
| <i>hsp-16.2; processed</i>        | ATCTTATGAGAGATATGGCTC   | Forward         | Endogenous         | qPCR on cDNA     |
| <i>hsp-16.2; processed</i>        | TTGTTAAACAATCTCAGAAGACT | Reverse         | Endogenous         | qPCR on cDNA     |
| <i>mCherry; nascent</i>           | AAGGGTGAAGAAGATAACATGG  | Forward         | Transgene          | qPCR on cDNA     |
| <i>mCherry; nascent</i>           | GTCCGCCTTTAGTTACCTGA    | Reverse         | Transgene          | qPCR on cDNA     |
| <i>hsp-16.2; nascent</i>          | TGAGTCTTCTGAGGTAATAA    | Forward         | Endogenous         | qPCR on cDNA     |
| <i>hsp-16.2; nascent</i>          | CATTGTTAAACAATCTGAAAGC  | Reverse         | Endogenous         | qPCR on cDNA     |
| <i>its-1</i>                      | CCTGGTGGCTATATGCGTCT    | Forward         | Endogenous         | qPCR on cDNA     |
| <i>its-1</i>                      | CCGTGAAGACTTTTGGCAAT    | Reverse         | Endogenous         | qPCR on cDNA     |
| intergenic locus on <i>chr V</i>  | CAAAAAGCGTTTTTCAGCACA   | Forward         | Control            | qPCR after ChIP  |
| intergenic locus on <i>chr V</i>  | TCTGAAGTGGGGAGCTTTGT    | Reverse         | Control            | qPCR after ChIP  |
| intergenic locus on <i>chr II</i> | AAGACAAAACACTGCCAGAAAA  | Forward         | Control            | qPCR after ChIP  |
| intergenic locus on <i>chr II</i> | ATCCTTGACGCCAGTGACAT    | Reverse         | Control            | qPCR after ChIP  |
| <i>hsp-16.2</i>                   | GGGGATCCAGTGAGATGATT    | Forward         | Ectopic            | qPCR after ChIP  |
| <i>hsp-16.2</i>                   | ATGTGAGTCGCCCTCCTTTT    | Reverse         | Ectopic            | qPCR after ChIP  |
| <i>hsp-16.2</i>                   | TGGACGGAATAGTGGTAAAGTG  | Forward         | Endogenous         | qPCR after ChIP  |
| <i>hsp-16.2</i>                   | CCTTTTGCAACAAGCAGCTC    | Reverse         | Endogenous         | qPCR after ChIP  |
| <i>hsp-16.2</i>                   | AAGCCAACACGCTTTGTCT     | Forward         | Ectopic/endogenous | qPCR after ChIP  |
| <i>hsp-16.2</i>                   | TCCAGTGAGTTCGTTCAAGA    | Reverse         | Endogenous         | qPCR after ChIP  |
| <i>hsp-16.2</i>                   | CGACTCTAGAGGATCAAGAGCA  | Reverse         | Ectopic            | qPCR after ChIP  |
| <i>hsp-16.2</i>                   | ATTACGAGATTCTCTTCGAC    | Forward         | Endogenous         | qPCR after ChIP  |
| <i>hsp-16.2</i>                   | GTACGCTATCAATCCAAGGAG   | Reverse         | Endogenous         | qPCR after ChIP  |
| <i>hsp-16.2</i>                   | CACAAAGGGACAGTTCTGAG    | Forward         | Endogenous         | qPCR after ChIP  |
| <i>hsp-16.2</i>                   | TAAGATCTAGGAACATCCACAG  | Reverse         | Endogenous         | qPCR after ChIP  |
| <i>hsp-16.2</i>                   | CTCTGACTCCAAACTCTC      | Forward         | Endogenous         | qPCR after ChIP  |
| <i>hsp-16.2</i>                   | AACATTTCTGCCTTCTCCT     | Reverse         | Endogenous         | qPCR after ChIP  |
| <i>hsp-16.2</i>                   | GAACATGGATACTTGAAACGCT  | Forward         | Endogenous         | qPCR after ChIP  |
| <i>hsp-16.2</i>                   | GTGATGAGTTGTCTTCTTTGG   | Reverse         | Endogenous         | qPCR after ChIP  |
| <i>mCherry</i>                    | GTCAGTGAACAACCTCTCC     | Forward         | Ectopic            | qPCR after ChIP  |
| <i>mCherry</i>                    | TAAACATCCGGCAGATATACC   | Reverse         | Ectopic            | qPCR after ChIP  |
| <i>mCherry</i>                    | GGAGAAAGAGCATGTAGGA     | Forward         | Ectopic            | qPCR after ChIP  |
| <i>mCherry</i>                    | TCCACAACGAGGATTACAC     | Reverse         | Ectopic            | qPCR after ChIP  |
| <i>Cbunc-119</i>                  | CACAACAAAGCCGACTACTC    | Forward         | Ectopic            | qPCR after ChIP  |
| <i>Cbunc-119</i>                  | GGGAAGGAACAACTAGACAG    | Reverse         | Ectopic            | qPCR after ChIP  |
| <i>Cbunc-119</i>                  | ACCAAACCGATATGAAAGCC    | Forward         | Ectopic            | qPCR after ChIP  |
| <i>Cbunc-119</i>                  | AAGATACCTTGAGTGATCCC    | Reverse         | Ectopic            | qPCR after ChIP  |
| <i>lmn-1</i>                      | CAAGAGAACAACAGACTCCAG   | Forward         | Endogenous         | qPCR copy number |
| <i>lmn-1</i>                      | TAATAAGACCACCGCATCAG    | Reverse         | Endogenous         | qPCR copy number |
| <i>unc-119</i>                    | CCACACCACCTCTAATCTCC    | Forward         | Endogenous/tg      | qPCR copy number |
| <i>unc-119</i>                    | TCATTTCTCTGCGTCTTCT     | Reverse         | Endogenous/tg      | qPCR copy number |
| <i>hsp-16.2</i>                   | TGAATCAGAATATGGAGAACGG  | Forward         | Endogenous/tg      | qPCR copy number |
| <i>hsp-16.2</i>                   | GACTCACATTCGGTACATGG    | Reverse         | Endogenous/tg      | qPCR copy number |
| <i>bla</i>                        | ATCGTTGTCAGAAGTAAGTTGG  | Forward         | Tg                 | qPCR copy number |
| <i>bla</i>                        | GCCGCATACACTAATCTCAG    | Reverse         | Tg                 | qPCR copy number |

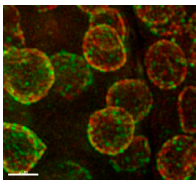

Video 1. **3D reconstruction of WT *C. elegans* embryos stained for nuclear pores and lamina.** WT *C. elegans* embryos were fixed on glass slides and immunostained for nuclear pores (Mab414; green) and nuclear lamina (anti-LMN-1; red). Images were acquired on a super-resolution structured illumination microscope (Elyra system [Carl Zeiss] with an EM-CCD camera [Andor iXon 885]), and the 3D reconstruction was performed with Zen software.
